# Supplementary material
Source: PubMed Central journal article supplement (PMC9194623)
Supplement: djac026_supplementary_data.pdf [file djac026_supplementary_data.pdf]

## **Supplementary Materials**

### **The Oncology Care Model and Adherence to Oral Cancer Drugs: A Difference-in-Differences Analysis**

Nancy L. Keating, MD, MPH, Gabriel A. Brooks, MD, MPH, Mary Beth Landrum, PhD, Pang-Hsiang Liu, MD, PhD, Robert Wolf, MS, Lauren E. Riedel, MPH, Nirav S. Kapadia, MD, MS, Shalini Jhatakia, MA, Amanda Tripp, PhD, MPH, Carol Simon, PhD, Van Doren Hsu, Pharm D, Colleen M. Kummet, PhD, Andrea Hassol, MSPH

## Supplementary Methods

### Identification of study cohorts.

Analyses focused on beneficiary-episodes for (a) chronic leukemia (ICD9 codes 205.10, 205.11, 205.12; ICD10 codes C92.10, C92.11, C92.12) treated with TKIs (imatinib, dasatinib, nilotinib, bosutinib, ponatinib); (b) prostate cancer (ICD9 code 185; ICD10 code C61) treated with enzalutamide or abiraterone (initially approved for the treatment of metastatic castrate-resistant prostate cancer (abiraterone in 2011, enzalutamide in 2012), then for metastatic high-risk castration-sensitive prostate cancer (abiraterone in February 2018) and more recently, for non-metastatic castration-resistant prostate cancer (enzalutamide in July 2018)); or (c) “low-risk” breast cancer (ICD9 code 174, 175; ICD10 code C50) treated with tamoxifen, anastrozole, exemestane, or letrozole and no other systemic cancer therapy (“low-risk” breast cancer episodes by definition included only oral hormonal treatments). Oral drugs were identified in Part D prescription drug event data. Apalutamide, another oral anti-androgen for treating prostate cancer approved in February 2018 for non-metastatic castrate-resistant prostate cancer, was used infrequently during the study period (0.8% of episodes for prostate cancer) and was not included. We included beneficiaries enrolled in Medicare Part D during all six months of an episode (or until death or hospice enrollment).

### Adherence

As described in the Methods, to measure adherence, we calculated the proportion of days covered (PDC) by summing the number of actual days’ supply dispensed divided by the number of days between the index fill of the drug of interest and the last day of the six-month episode (or the date of death or hospice enrollment). PDC is recommended by the Pharmacy Quality Alliance for measuring adherence in studies using administrative data. We capped PDC at 100% (PDC could exceed 100% if patients had early refills or if the last fill days supply exceeded the remaining days in the 6-month episode).

If beneficiaries were hospitalized, the number of days in the hospital was subtracted from the denominator for calculating PDC. For CML episodes, we assessed use of any TKI (including imatinib, dasatinib, nilotinib, bosutinib, or ponatinib); we also assessed adherence individually for the three most frequently prescribed TKIs—imatinib, dasatinib, and nilotinib. For prostate cancer episodes, we examined use of enzalutamide or abiraterone; we also assessed adherence to each drug separately. Episodes for prostate cancer were censored if a beneficiary switched to a different drug for treating metastatic prostate cancer, suggesting disease progression while on abiraterone or enzalutamide. Thus, we censored at the time of a switch to enzalutamide (if on abiraterone), abiraterone (if on enzalutamide), docetaxel, cabazitaxel, sipuleucel-T, or mitoxantrone. For breast cancer episodes, we examined use of any hormonal therapy and each of the four drugs individually. We expected that most beneficiaries taking hormonal therapy had non-metastatic disease and were thus on long-term hormonal therapy. As above, patients taking hormonal therapy for metastatic cancer were included only if they were taking hormonal therapy without any other systemic cancer therapies, including CDK4/6 inhibitors, for the entire six-month episode.

# Supplementary Tables

**Supplementary Table 1. Additional Patient, Practice and Market Characteristics of OCM and Comparison Episodes**

| Episode characteristics                                  | Chronic Myelogenous Leukemia Cohort |                  |                     |                         | Prostate Cancer Cohort |                  |                     |                         | Low-Risk Breast Cancer Cohort |                  |                     |                         |
|----------------------------------------------------------|-------------------------------------|------------------|---------------------|-------------------------|------------------------|------------------|---------------------|-------------------------|-------------------------------|------------------|---------------------|-------------------------|
|                                                          | OCM Baseline                        | OCM Intervention | Comparison Baseline | Comparison Intervention | OCM Baseline           | OCM Intervention | Comparison Baseline | Comparison Intervention | OCM Baseline                  | OCM Intervention | Comparison Baseline | Comparison Intervention |
| No. of episodes                                          | 4349                                | 7803             | 4921                | 8408                    | 8131                   | 14919            | 10358               | 17768                   | 81887                         | 155916           | 93258               | 159296                  |
| Beneficiary alignment in other value-based models, N (%) |                                     |                  |                     |                         |                        |                  |                     |                         |                               |                  |                     |                         |
| Yes                                                      | 1322 (30.4)                         | 3434 (44.0)      | 1164 (23.7)         | 3339 (39.7)             | 2564 (31.5)            | 6656 (44.6)      | 2744 (26.5)         | 6953 (39.1)             | 26128 (31.9)                  | 72630 (46.6)     | 24417 (26.2)        | 65709 (41.2)            |
| No                                                       | 3027 (69.6)                         | 4369 (56.0)      | 3757 (76.3)         | 5069 (60.3)             | 5567 (68.5)            | 8263 (55.4)      | 7614 (73.5)         | 10815 (60.9)            | 55759 (68.1)                  | 83286 (53.4)     | 68841 (73.8)        | 93587 (58.8)            |
| Beneficiary had episode in prior 6 months                |                                     |                  |                     |                         |                        |                  |                     |                         |                               |                  |                     |                         |
| Yes                                                      | 3322 (76.4)                         | 5919 (75.9)      | 3748 (76.2)         | 6328 (75.3)             | 7067 (86.9)            | 11818 (79.2)     | 9052 (87.4)         | 14047(79.1)             | 43400 (53.0)                  | 78536 (50.4)     | 50409 (54.1)        | 76782 (48.2)            |
| No                                                       | 1027 (23.6)                         | 1884 (24.1)      | 1173 (23.8)         | 2080 (24.7)             | 1064 (13.1)            | 3101 (20.8)      | 1306 (12.6)         | 3721 (20.9)             | 38487 (47.0)                  | 77380 (49.6)     | 42849 (45.9)        | 82514 (51.8)            |
| Chemotherapy source, N (%) <sup>a</sup>                  |                                     |                  |                     |                         |                        |                  |                     |                         |                               |                  |                     |                         |
| Part D only                                              | 4312 (99.1)                         | 7750 (99.3)      | 4882 (99.2)         | 8328 (99.0)             | 1225 (15.1)            | 1845 (12.4)      | 1614 (15.6)         | 2008 (11.3)             | 81887 (100)                   | 155916 (100)     | 93258 (100)         | 159296 (100)            |
| Parts B&D                                                | 37 (0.9)                            | 53 (0.7)         | 39 (0.8)            | 80 (1.0)                | 6906 (84.9)            | 13074 (87.6)     | 8744 (84.4)         | 15760 (88.7)            |                               |                  |                     |                         |
| Practice Characteristics                                 |                                     |                  |                     |                         |                        |                  |                     |                         |                               |                  |                     |                         |
| Affiliated with Academic Medical Center, N (%)           |                                     |                  |                     |                         |                        |                  |                     |                         |                               |                  |                     |                         |
| No                                                       | 3611 (83.0)                         | 6215 (79.6)      | 4142 (84.2)         | 6634 (78.9)             | 6407 (78.8)            | 11120 (74.5)     | 8513 (82.2)         | 13787 (77.6)            | 68796 (84.0)                  | 131003 (84.0)    | 81063 (86.9)        | 134686 (84.6)           |
| Yes                                                      | 738 (17.0)                          | 1588 (20.4)      | 779 (15.8)          | 1774 (21.1)             | 1724 (21.2)            | 3799 (25.5)      | 1845 (17.8)         | 3981 (22.4)             | 13091 (16.0)                  | 24913 (16.0)     | 12195 (13.1)        | 24610 (15.4)            |
| Affiliated with health system, N (%)                     |                                     |                  |                     |                         |                        |                  |                     |                         |                               |                  |                     |                         |
| No/Missing                                               | 3099 (71.3)                         | 4992 (64.0)      | 2068 (42.0)         | 3158 (37.6)             | 5374 (66.1)            | 8735 (58.5)      | 4525 (43.7)         | 7414 (41.7)             | 57003 (69.6)                  | 103841 (66.6)    | 39982 (42.9)        | 63088 (39.6)            |
| Yes                                                      | 1250 (28.7)                         | 2811 (36.0)      | 2853 (58.0)         | 5250 (62.4)             | 2757 (33.9)            | 6184 (41.5)      | 5833 (56.3)         | 10354 (58.3)            | 24884 (30.4)                  | 52075 (33.4)     | 53276 (57.1)        | 96208 (60.4)            |
| Owned by a hospital, N (%)                               |                                     |                  |                     |                         |                        |                  |                     |                         |                               |                  |                     |                         |
| No/Missing                                               | 3239 (74.5)                         | 6465 (82.9)      | 2513 (51.1)         | 5851 (69.6)             | 5640 (69.4)            | 12187 (81.7)     | 5061 (48.9)         | 11339 (63.8)            | 60785 (74.2)                  | 132855 (85.2)    | 47609 (51.1)        | 110392 (69.3)           |
| Yes                                                      | 1110 (25.5)                         | 1338 (17.1)      | 2408 (48.9)         | 2557 (30.4)             | 2491 (30.6)            | 2732 (18.3)      | 5297 (51.1)         | 6429 (36.2)             | 21102 (25.8)                  | 23061 (14.8)     | 45649 (48.9)        | 48904 (30.7)            |
| Missing data on ownership                                | <11 (<0.1)                          | 11 (0.1)         | <11 (<0.1)          | 32 (0.4)                | 12 (0.1)               | 18 (0.1)         | 12 (0.1)            | 79 (0.4)                | 103 (0.1)                     | 241 (0.2)        | 190 (0.2)           | 467 (0.3)               |
| Total N episodes quartile, N (%)                         |                                     |                  |                     |                         |                        |                  |                     |                         |                               |                  |                     |                         |
| 1 to 42                                                  | 44 (1.0)                            | 53 (0.7)         | 263 (5.3)           | 367 (4.4)               | 49 (0.6)               | 85 (0.6)         | 399 (3.9)           | 623 (3.5)               | 857 (1.0)                     | 1130 (0.7)       | 5345 (5.7)          | 6901 (4.3)              |
| 43 50 99                                                 | 138 (3.2)                           | 277 (3.5)        | 798 (16.2)          | 1033 (12.3)             | 234 (2.9)              | 448 (3.0)        | 1311 (12.7)         | 1835 (10.3)             | 3247 (4.0)                    | 5540 (3.6)       | 16568 (17.8)        | 21937 (13.8)            |
| 100 to 196                                               | 558 (12.8)                          | 712 (9.1)        | 1301 (26.4)         | 1962 (23.3)             | 1089 (13.4)            | 1480 (9.9)       | 2638 (25.5)         | 3607 (20.3)             | 12284 (15.0)                  | 17378 (11.1)     | 25005 (26.8)        | 38261 (24.0)            |
| 197-7239                                                 | 3609 (83.0)                         | 6761 (86.6)      | 2559 (52.0)         | 5046 (60.0)             | 6759 (83.1)            | 12906 (86.5)     | 6010 (58.0)         | 11703 (65.9)            | 65499 (80.0)                  | 131868 (84.6)    | 46340 (49.7)        | 92197 (57.9)            |
| NPIs that only have oncology specialty, N (%)            |                                     |                  |                     |                         |                        |                  |                     |                         |                               |                  |                     |                         |

|                                                         |             |             |             |             |             |              |             |              |              |               |              |               |
|---------------------------------------------------------|-------------|-------------|-------------|-------------|-------------|--------------|-------------|--------------|--------------|---------------|--------------|---------------|
| No                                                      | 3325 (76.5) | 6356 (81.5) | 3373 (68.5) | 6027 (71.7) | 6484 (79.7) | 12497 (83.8) | 7673 (74.1) | 14141 (79.6) | 63702 (77.8) | 125398 (80.4) | 63978 (68.6) | 115295 (72.4) |
| Yes                                                     | 1024 (23.5) | 1447 (18.5) | 1548 (31.5) | 2381 (28.3) | 1647 (20.3) | 2422 (16.2)  | 2685 (25.9) | 3627 (20.4)  | 18185 (22.2) | 30518 (19.6)  | 29280 (31.4) | 44001 (27.6)  |
| Practice has 3 or less oncology NPIs, N (%)             |             |             |             |             |             |              |             |              |              |               |              |               |
| No                                                      | 4256 (97.9) | 7660 (98.2) | 4241 (86.2) | 7556 (89.9) | 7874 (96.8) | 14583 (97.7) | 8913 (86.0) | 15824 (89.1) | 79903 (97.6) | 152866 (98.0) | 79640 (85.4) | 141378 (88.8) |
| Yes                                                     | 93 (2.1)    | 143 (1.8)   | 680 (13.8)  | 852 (10.1)  | 257 (3.2)   | 336 (2.3)    | 1445 (14.0) | 1944 (10.9)  | 1984 (2.4)   | 3050 (2.0)    | 13618 (14.6) | 17918 (11.2)  |
| Practice has at least one radiation oncologist, N (%)   |             |             |             |             |             |              |             |              |              |               |              |               |
| No                                                      | 1311 (30.1) | 2156 (27.6) | 2795 (56.8) | 4267 (50.7) | 2489 (30.6) | 4202 (28.2)  | 5456 (52.7) | 7980 (44.9)  | 25869 (31.6) | 47339 (30.4)  | 52457 (56.2) | 81135 (50.9)  |
| Yes                                                     | 3038 (69.9) | 5647 (72.4) | 2126 (43.2) | 4141 (49.3) | 5642 (69.4) | 10717 (71.8) | 4902 (47.3) | 9788 (55.1)  | 56018 (68.4) | 108577 (69.6) | 40801 (43.8) | 78161 (49.1)  |
| Practice has at least one gynecologic oncologist, N (%) |             |             |             |             |             |              |             |              |              |               |              |               |
| No                                                      | 2062 (47.4) | 2755 (35.3) | 3267 (66.4) | 4973 (59.1) | 3739 (46.0) | 5382 (36.1)  | 6759 (65.3) | 10533 (59.3) | 38246 (46.7) | 58155 (37.3)  | 61550 (66.0) | 96337 (60.5)  |
| Yes                                                     | 2287 (52.6) | 5048 (64.7) | 1654 (33.6) | 3435 (40.9) | 4392 (54.0) | 9537 (63.9)  | 3599 (34.7) | 7235 (40.7)  | 43641 (53.3) | 97761 (62.7)  | 31708 (34.0) | 62959 (39.5)  |
| Practice has at least one surgical oncologist, N (%)    |             |             |             |             |             |              |             |              |              |               |              |               |
| No                                                      | 2563 (58.9) | 4029 (51.6) | 3762 (76.4) | 5426 (64.5) | 4607 (56.7) | 7342 (49.2)  | 7699 (74.3) | 11201 (63.0) | 48218 (58.9) | 82354 (52.8)  | 69670 (74.7) | 104635 (65.7) |
| Yes                                                     | 1786 (41.1) | 3774 (48.4) | 1159 (23.6) | 2982 (35.5) | 3524 (43.3) | 7577 (50.8)  | 2659 (25.7) | 6567 (37.0)  | 33669 (41.1) | 73562 (47.2)  | 23588 (25.3) | 54661 (34.3)  |
| Percent NP/PA Quartile, N (%)                           |             |             |             |             |             |              |             |              |              |               |              |               |
| 0%                                                      | 1105 (25.4) | 821 (10.5)  | 1431 (29.1) | 1883 (22.4) | 1944 (23.9) | 1689 (11.3)  | 2476 (23.9) | 3066 (17.3)  | 19736 (24.1) | 18454 (11.8)  | 26341 (28.2) | 35145 (22.1)  |
| 0 to 5.9%                                               | 753 (17.3)  | 1326 (17.0) | 314 (6.4)   | 416 (4.9)   | 1338 (16.5) | 2339 (15.7)  | 1143 (11.0) | 1248 (7.0)   | 14350 (17.5) | 23951 (15.4)  | 7184 (7.7)   | 8624 (5.4)    |
| >>5.9% to 17.5%                                         | 1319 (30.3) | 1516 (19.4) | 1559 (31.7) | 2076 (24.7) | 2369 (29.1) | 3115 (20.9)  | 3626 (35.0) | 4546 (25.6)  | 23190 (28.3) | 30908 (19.8)  | 31500 (33.8) | 43203 (27.1)  |
| >17.6%                                                  | 1172 (26.9) | 4140 (53.1) | 1617 (32.9) | 4033 (48.0) | 2480 (30.5) | 7776 (52.1)  | 3113 (30.1) | 8908 (50.1)  | 24611 (30.1) | 82603 (53.0)  | 28233 (30.3) | 72324 (45.4)  |
| Market Characteristics                                  |             |             |             |             |             |              |             |              |              |               |              |               |
| Market population quartile, N (%)                       |             |             |             |             |             |              |             |              |              |               |              |               |
| 4684-63036                                              | 53 (1.2)    | 102 (1.3)   | 317 (6.4)   | 438 (5.2)   | 72 (0.9)    | 196 (1.3)    | 445 (4.3)   | 697 (3.9)    | 1039 (1.3)   | 2513 (1.6)    | 5897 (6.3)   | 8915 (5.6)    |
| 63,037-150,033                                          | 427 (9.8)   | 738 (9.5)   | 801 (16.3)  | 1166 (13.9) | 664 (8.2)   | 1163 (7.8)   | 1480 (14.3) | 2189 (12.3)  | 7558 (9.2)   | 14208 (9.1)   | 15852 (17.0) | 24616 (15.5)  |
| 150,034-371,537                                         | 754 (17.3)  | 1110 (14.2) | 1419 (28.8) | 2283 (27.2) | 1357 (16.7) | 2202 (14.8)  | 2614 (25.2) | 4026 (22.7)  | 12293 (15.0) | 22395 (14.4)  | 23294 (25.0) | 39048 (24.5)  |
| 371,538-10,170,292                                      | 3115 (71.6) | 5853 (75.0) | 2384 (48.4) | 4521 (53.8) | 6038 (74.3) | 11358 (76.1) | 5819 (56.2) | 10856 (61.1) | 60997 (74.5) | 116800 (74.9) | 48215 (51.7) | 86717 (54.4)  |
| Percent over 65 quartile, N (%)                         |             |             |             |             |             |              |             |              |              |               |              |               |
| 7.1 to13.09%                                            | 1773 (40.8) | 1793 (23.0) | 1858 (37.8) | 2260 (26.9) | 3086 (38.0) | 3394 (22.7)  | 4147 (40.0) | 4741 (26.7)  | 30783 (37.6) | 34040 (21.8)  | 35869 (38.5) | 39896 (25.0)  |
| 13.10 to 14.61%                                         | 1134 (26.1) | 2766 (35.4) | 1560 (31.7) | 2878 (34.2) | 2532 (31.1) | 5525 (37.0)  | 3305 (31.9) | 6572 (37.0)  | 25101 (30.7) | 59208 (38.0)  | 29396 (31.5) | 56859 (35.7)  |
| 14.62 to 17.89%                                         | 839 (19.3)  | 1632 (20.9) | 878 (17.8)  | 2093 (24.9) | 1362 (16.7) | 3409 (22.9)  | 1876 (18.1) | 4162 (23.4)  | 14592 (17.8) | 32961 (21.1)  | 17555 (18.8) | 39319 (24.7)  |
| >17.89%                                                 | 603 (13.9)  | 1612 (20.7) | 625 (12.7)  | 1177 (14.0) | 1151 (14.2) | 2591 (17.4)  | 1030 (9.9)  | 2293 (12.9)  | 11411 (13.9) | 29707 (19.1)  | 10438 (11.2) | 23222 (14.6)  |
| Percent poverty quartile, N (%)                         |             |             |             |             |             |              |             |              |              |               |              |               |
| 3.9 to 12.0%                                            | 918 (21.1)  | 1981 (25.4) | 869 (17.7)  | 2427 (28.9) | 1617 (19.9) | 3898 (26.1)  | 1819 (17.6) | 5658 (31.8)  | 17041 (20.8) | 41499 (26.6)  | 18585 (19.9) | 50215 (31.5)  |
| >12.0 to 15.4%                                          | 1515 (34.8) | 2618 (33.6) | 1146 (23.3) | 2290 (27.2) | 2777 (34.2) | 5005 (33.5)  | 2401 (23.2) | 4839 (27.2)  | 27884 (34.1) | 52008 (33.4)  | 21454 (23.0) | 44411 (27.9)  |
| >15.4 to 18.8%                                          | 1137 (26.1) | 2632 (33.7) | 1683 (34.2) | 2392 (28.4) | 2228 (27.4) | 4755 (31.9)  | 3987 (38.5) | 5224 (29.4)  | 22580 (27.6) | 49350 (31.7)  | 33261 (35.7) | 45020 (28.3)  |
| >18.8%                                                  | 779 (17.9)  | 572 (7.3)   | 1223 (24.9) | 1299 (15.4) | 1509 (18.6) | 1261 (8.5)   | 2151 (20.8) | 2047 (11.5)  | 14382 (17.6) | 13059 (8.4)   | 19958 (21.4) | 19650 (12.3)  |

|                                                                |             |             |             |             |             |              |             |              |              |               |              |              |
|----------------------------------------------------------------|-------------|-------------|-------------|-------------|-------------|--------------|-------------|--------------|--------------|---------------|--------------|--------------|
| Medicare Advantage penetration quartile, N (%)                 |             |             |             |             |             |              |             |              |              |               |              |              |
| 0.7 to 17.93%                                                  | 436 (10.0)  | 378 (4.8)   | 625 (12.7)  | 547 (6.5)   | 844 (10.4)  | 706 (4.7)    | 1232 (11.9) | 1010 (5.7)   | 8348 (10.2)  | 7854 (5.0)    | 13264 (14.2) | 12119 (7.6)  |
| 17.94 to 28.31%                                                | 1309 (30.1) | 1384 (17.7) | 1572 (31.9) | 2060 (24.5) | 2256 (27.8) | 2565 (17.2)  | 3050 (29.5) | 4138 (23.3)  | 23964 (29.3) | 29683 (19.0)  | 29259 (31.4) | 41137 (25.8) |
| 28.32% to 39.24%                                               | 1469 (33.8) | 3412 (43.7) | 1475 (30.0) | 2777 (33.0) | 2719 (33.4) | 6286 (42.1)  | 3308 (31.9) | 5626 (31.7)  | 27933 (34.1) | 65435 (42.0)  | 26997 (28.9) | 49458 (31.0) |
| >39.24%                                                        | 1135 (26.1) | 2629 (33.7) | 1249 (25.4) | 3024 (36.0) | 2312 (28.4) | 5362 (35.9)  | 2768 (26.7) | 6994 (39.4)  | 21642 (26.4) | 52944 (34.0)  | 23738 (25.5) | 56582 (35.5) |
| Specialists per PCP ratio quartile, N (%)                      |             |             |             |             |             |              |             |              |              |               |              |              |
| 0 to 0.684                                                     | 72 (1.7)    | 143 (1.8)   | 260 (5.3)   | 429 (5.1)   | 171 (2.1)   | 199 (1.3)    | 428 (4.1)   | 781 (4.4)    | 1599 (2.0)   | 3158 (2.0)    | 5114 (5.5)   | 8634 (5.4)   |
| 0.685 to 0.944                                                 | 359 (8.3)   | 679 (8.7)   | 770 (15.6)  | 876 (10.4)  | 511 (6.3)   | 1022 (6.9)   | 1434 (13.7) | 1652 (9.3)   | 6303 (7.7)   | 12514 (8.0)   | 14462 (15.5) | 18235 (11.4) |
| 0.955 to 1.257                                                 | 605 (13.9)  | 818 (10.5)  | 1282 (26.1) | 2030 (24.1) | 1102 (13.6) | 1756 (11.8)  | 2548 (24.6) | 3856 (21.7)  | 11508 (14.1) | 20230 (13.0)  | 23809 (25.5) | 40721 (25.6) |
| >1.257                                                         | 3313 (76.2) | 6163 (79.0) | 2609 (53.0) | 5073 (60.3) | 6347 (78.1) | 11942 (80.0) | 5948 (57.6) | 11479 (64.6) | 62477 (76.3) | 120014 (77.0) | 49873 (53.5) | 91706 (57.6) |
| MBSF Comp FFS IP ER quartile, N (%)                            |             |             |             |             |             |              |             |              |              |               |              |              |
| 195 to 1535                                                    | 274 (6.3)   | 594 (7.6)   | 740 (15.0)  | 1301 (15.5) | 758 (9.3)   | 1490 (10.0)  | 1579 (15.2) | 3044 (17.1)  | 7093 (8.7)   | 13174 (8.4)   | 13535 (14.5) | 24338 (15.3) |
| >1535 to 1834                                                  | 1261 (29.0) | 2257 (28.9) | 1196 (24.3) | 2002 (23.8) | 2117 (26.0) | 3933 (26.4)  | 2849 (27.5) | 5197 (29.3)  | 22966 (28.0) | 47373 (30.4)  | 24867 (26.7) | 43089 (27.0) |
| >1834 to 2096                                                  | 1643 (37.8) | 2753 (35.3) | 1373 (27.9) | 2406 (28.6) | 2966 (36.5) | 4872 (32.7)  | 2591 (25.0) | 4316 (24.3)  | 28536 (34.8) | 50249 (32.2)  | 27329 (29.3) | 47031 (29.5) |
| >2096                                                          | 1171 (26.9) | 2199 (28.2) | 1612 (32.8) | 2699 (32.1) | 2290 (28.2) | 4624 (31.0)  | 3339 (32.2) | 5211 (29.3)  | 23292 (28.4) | 45120 (28.9)  | 27527 (29.5) | 44838 (28.1) |
| Primary care health professional shortage area category, N (%) |             |             |             |             |             |              |             |              |              |               |              |              |
| 0                                                              | 1227 (28.2) | 2655 (34.0) | 1949 (39.6) | 3533 (42.0) | 2503 (30.8) | 5665 (38.0)  | 4532 (43.7) | 7991 (45.0)  | 25543 (31.2) | 55231 (35.4)  | 39834 (42.7) | 67389 (42.3) |
| >0 to 20                                                       | 3094 (71.1) | 5064 (64.9) | 2911 (59.2) | 4774 (56.8) | 5539 (68.1) | 9089 (60.9)  | 5715 (55.2) | 9582 (53.9)  | 55043 (67.2) | 97393 (62.5)  | 52393 (56.2) | 89861 (56.4) |
| >20 to 100                                                     | 28 (0.6)    | 84 (1.1)    | 61 (1.2)    | 101 (1.2)   | 87 (1.1)    | 165 (1.1)    | 111 (1.1)   | 195 (1.1)    | 1301 (1.6)   | 3292 (2.1)    | 1031 (1.1)   | 2046 (1.3)   |

<sup>a</sup>Chemotherapy source was based on any chemotherapy received during the episode, including Part B drugs, even though our current analyses focus only on Part D drugs. By OCM definition of "low-risk breast cancer episodes," these episodes included beneficiaries with breast cancer who were receiving only oral hormonal therapies. OCM=Oncology Care Model; NPI=National Provider Identifier; NP=Nurse practitioner; PA=physician's assistant; PCP=primary care physician; MBSF=Master Beneficiary Summary File; FFS=fee-for-service

**Supplementary Table 2. Adherence to individual tyrosine kinase inhibitors for CML<sup>a</sup>**

| Proportion of days covered | No. of Episodes |            | OCM Proportion of Days Covered |                      | Comparison Proportion of Days Covered |                      | Impact Estimates |                       |            |            |
|----------------------------|-----------------|------------|--------------------------------|----------------------|---------------------------------------|----------------------|------------------|-----------------------|------------|------------|
|                            | OCM             | Comparison | Baseline percent               | Intervention percent | Baseline percent                      | Intervention percent | DID, %           | <i>P</i> <sup>a</sup> | 90% LCL, % | 90% UCL, % |
| All TKIs                   | 12,152          | 13,329     | 87.6                           | 86.1                 | 88.1                                  | 86.8                 | -0.3%            | 0.60                  | -1.2       | 0.6        |
| Dasatinib only             | 2,428           | 2,773      | 86.9                           | 85.7                 | 87.3                                  | 85.5                 | 0.7%             | 0.57                  | -1.2       | 2.5        |
| Imatinib only              | 6,001           | 6,740      | 89.3                           | 87.6                 | 90.1                                  | 89.1                 | -0.7%            | 0.27                  | -1.8       | 0.4        |
| Nilotinib only             | 2,539           | 2,592      | 86.2                           | 84.6                 | 85.8                                  | 84.4                 | -0.2%            | 0.87                  | -2.4       | 2.0        |

<sup>a</sup> Impact estimates and 2-sided P values based on difference-in-differences regression analysis. TKI=tyrosine kinase inhibitor; OCM: Oncology Care Model intervention group; PDC: Proportion of days covered; TKIs: Tyrosine kinase inhibitors; DID: difference-in-differences estimate; LCL=lower confidence interval; UCL=upper confidence interval

**Supplementary Table 3. Adherence to abiraterone and enzalutamide for prostate cancer**

| Proportion of days covered  | No. of Episodes |            | OCM Proportion of Days Covered |                      | Comparison Proportion of Days Covered |                      | Impact Estimates |                       |            |            |
|-----------------------------|-----------------|------------|--------------------------------|----------------------|---------------------------------------|----------------------|------------------|-----------------------|------------|------------|
|                             | OCM             | Comparison | Baseline percent               | Intervention percent | Baseline percent                      | Intervention percent | DID, %           | <i>P</i> <sup>a</sup> | 90% LCL, % | 90% UCL, % |
| Abiraterone or enzalutamide | 23,050          | 28,126     | 88.6                           | 84.5                 | 89.1                                  | 84.5                 | 0.4              | 0.34                  | -0.3       | 1.2        |
| Abiraterone                 | 13,039          | 15,303     | 90.4                           | 86.3                 | 90.5                                  | 86.1                 | 0.4              | 0.51                  | -0.6       | 1.3        |
| Enzalutamide                | 10,011          | 12,823     | 86.6                           | 82.0                 | 87.5                                  | 82.5                 | 0.4              | 0.54                  | -0.7       | 1.6        |

<sup>a</sup> Impact estimates and 2-sided P values based on difference-in-differences regression analysis. OCM: Oncology Care Model intervention group; PDC: Proportion of days covered; DID: difference-in-differences estimate; LCL=lower confidence interval; UCL=upper confidence interval

**Supplementary Table 4. Adherence to hormonal therapies for low-risk breast cancer**

| Proportion of days covered | No. of Episodes |            | OCM Proportion of Days Covered |                      | Comparison Proportion of Days Covered |                      | Impact Estimates |                       |            |            |
|----------------------------|-----------------|------------|--------------------------------|----------------------|---------------------------------------|----------------------|------------------|-----------------------|------------|------------|
|                            | OCM             | Comparison | Baseline percent               | Intervention percent | Baseline percent                      | Intervention percent | DID, %           | <i>P</i> <sup>a</sup> | 90% LCL, % | 90% UCL, % |
| All hormonal therapies     | 237,803         | 252,554    | 90.4                           | 90.8                 | 90.7                                  | 91.1                 | 0.0              | 0.86                  | -0.2       | 0.2        |
| Anastrozole only           | 116,515         | 126,709    | 91.5                           | 91.6                 | 91.5                                  | 91.9                 | -0.3             | 0.03                  | -0.6       | -0.1       |
| Exemestane only            | 17,958          | 16,290     | 88.3                           | 88.5                 | 88.5                                  | 87.8                 | 0.8              | 0.06                  | 0.1        | 1.6        |
| Letrozole only             | 56,865          | 57,893     | 90.7                           | 91.3                 | 91.1                                  | 91.5                 | 0.1              | 0.52                  | -0.2       | 0.5        |
| Tamoxifen only             | 35,591          | 39,892     | 88.8                           | 89.5                 | 89.4                                  | 89.6                 | 0.4              | 0.19                  | -0.1       | 0.9        |

<sup>a</sup> Impact estimates and 2-sided P values based on difference-in-differences regression analysis. OCM: Oncology Care Model intervention group; PDC: Proportion of days covered; DID: difference-in-differences estimate; LCL=lower confidence interval; UCL=upper confidence interval



**Supplementary Table 5: Adherence to TKIs for Chronic Myelogenous Leukemia: Full Model Results<sup>a</sup>**

| Episode characteristics                                | Coefficient | Robust Standard Error. | t     | P> t  | 95% Confidence Interval |           |
|--------------------------------------------------------|-------------|------------------------|-------|-------|-------------------------|-----------|
| OCM                                                    | -.004462    | .0054296               | -0.82 | 0.411 | -.0151038               | .0061798  |
| Intervention period                                    | -.0122855   | .0037371               | -3.29 | 0.001 | -.0196101               | -.0049608 |
| Interaction of OCM * intervention                      | -.0029822   | .0056173               | -0.53 | 0.595 | -.0139918               | .0080275  |
| Male                                                   | .0221079    | .0029016               | 7.62  | 0.000 | .0164209                | .027795   |
| Black                                                  | -.0179575   | .0066298               | -2.71 | 0.007 | -.0309517               | -.0049634 |
| Hispanic                                               | -.0036753   | .0097558               | -0.38 | 0.706 | -.0227963               | .0154457  |
| Other                                                  | .0075391    | .00811                 | 0.93  | 0.353 | -.0083562               | .0234344  |
| Dual Eligible                                          | .0088309    | .0042073               | 2.10  | 0.036 | .0005848                | .0170771  |
| Beneficiary alignment in other value-based models      | .0007585    | .0033093               | 0.23  | 0.819 | -.0057276               | .0072445  |
| HCC Risk Score_Q1                                      | .0474798    | .0078037               | 6.08  | 0.000 | .0321849                | .0627747  |
| HCC Risk Score_Q2                                      | .0393114    | .0036954               | 10.64 | 0.000 | .0320686                | .0465543  |
| HCC Risk Score_Q3                                      | .0202645    | .0037857               | 5.35  | 0.000 | .0128447                | .0276842  |
| Under 65                                               | -.0288165   | .0046469               | -6.20 | 0.000 | -.0379242               | -.0197088 |
| 70-74                                                  | -.0045835   | .0035169               | -1.30 | 0.192 | -.0114765               | .0023096  |
| 75-79                                                  | -.0081929   | .0045202               | -1.81 | 0.070 | -.0170524               | .0006666  |
| 80-84                                                  | -.0086897   | .0049518               | -1.75 | 0.079 | -.0183952               | .0010157  |
| Over 84                                                | -.0240258   | .0058955               | -4.08 | 0.000 | -.0355808               | -.0124708 |
| Beneficiary had previous episode in performance period | .0429407    | .0034553               | 12.43 | 0.000 | .0361685                | .0497128  |
| Affiliated with Academic Medical Center                | -.0128656   | .0059511               | -2.16 | 0.031 | -.0245295               | -.0012017 |
| Affiliated with health system                          | .0044095    | .0047172               | 0.93  | 0.350 | -.004836                | .0136549  |
| Owned by a hospital                                    | .0070964    | .0045008               | 1.58  | 0.115 | -.001725                | .0159178  |
| SK&A data missing                                      | -.0007344   | .0286693               | -0.03 | 0.980 | -.0569253               | .0554564  |
| Total N episodes quartile_Q1                           | -.0075675   | .0093851               | -0.81 | 0.420 | -.025962                | .010827   |
| Total N episodes quartile_Q2                           | -.0017852   | .0066138               | -0.27 | 0.787 | -.0147481               | .0111777  |
| Total N episodes quartile_Q3                           | -.0035832   | .0047543               | -0.75 | 0.451 | -.0129015               | .005735   |
| Practice has 3 or less oncology NPIs                   | .0023461    | .0066241               | 0.35  | 0.723 | -.010637                | .0153292  |
| NPIs that only have oncology specialty                 | .0083407    | .0041808               | 1.99  | 0.046 | .0001464                | .0165349  |
| Practice has at least one radiation oncologist         | .0003589    | .0042816               | 0.08  | 0.933 | -.0080329               | .0087508  |
| Practice has at least one surgical oncologist          | .0036988    | .0043479               | 0.85  | 0.395 | -.0048228               | .0122205  |
| Practice has at least one gynecologic oncologist       | -.0047701   | .0045015               | -1.06 | 0.289 | -.0135928               | .0040526  |
| Percent NP/PA Quartile_Q1                              | -.0077586   | .0062014               | -1.25 | 0.211 | -.019913                | .0043959  |
| Percent NP/PA Quartile_Q2                              | .0027341    | .0075313               | 0.36  | 0.717 | -.012027                | .0174951  |
| Percent NP/PA Quartile_Q3                              | -.004804    | .0037317               | -1.29 | 0.198 | -.0121179               | .00251    |
| Market population quartile_Q1                          | -.0008255   | .0092206               | -0.09 | 0.929 | -.0188976               | .0172466  |
| Market population quartile_Q2                          | .0000411    | .0069548               | 0.01  | 0.995 | -.0135901               | .0136723  |

|                                                                    |           |          |       |       |           |           |
|--------------------------------------------------------------------|-----------|----------|-------|-------|-----------|-----------|
| Market population quartile_Q3                                      | -.0094129 | .0052125 | -1.81 | 0.071 | -.0196292 | .0008033  |
| Percent over 65 quartile_Q2                                        | .0024721  | .0038147 | 0.65  | 0.517 | -.0050046 | .0099488  |
| Percent over 65 quartile_Q3                                        | .0043216  | .0051729 | 0.84  | 0.403 | -.0058171 | .0144603  |
| Percent over 65 quartile_Q4                                        | -.0020726 | .0069993 | -0.30 | 0.767 | -.015791  | .0116458  |
| Percent poverty quartile_Q1                                        | -.0032784 | .00501   | -0.65 | 0.513 | -.0130978 | .006541   |
| Percent poverty quartile_Q2                                        | -.0032883 | .0036796 | -0.89 | 0.372 | -.0105003 | .0039236  |
| Percent poverty quartile_Q4                                        | .008009   | .0048641 | 1.65  | 0.100 | -.0015245 | .0175424  |
| Medicare Advantage penetration quartile_Q1                         | -.004448  | .007185  | -0.62 | 0.536 | -.0185304 | .0096343  |
| Medicare Advantage penetration quartile_Q2                         | -.0037564 | .0042064 | -0.89 | 0.372 | -.0120007 | .0044879  |
| Medicare Advantage penetration quartile_Q4                         | -.0006765 | .0042941 | -0.16 | 0.875 | -.0090928 | .0077398  |
| Primary care health professional shortage area category_0          | -.004909  | .0054373 | -0.90 | 0.367 | -.0155659 | .0057479  |
| Primary care health professional shortage area category_>20 to 100 | -.0098053 | .0188955 | -0.52 | 0.604 | -.0468398 | .0272293  |
| Specialists per PCP ratio quartile_Q1                              | .0105619  | .0082851 | 1.27  | 0.202 | -.0056765 | .0268004  |
| Specialists per PCP ratio quartile_Q2                              | .0040254  | .0063126 | 0.64  | 0.524 | -.008347  | .0163978  |
| Specialists per PCP ratio quartile_Q3                              | .0104556  | .0049684 | 2.10  | 0.035 | .0007176  | .0201935  |
| MBSF Comp FFS IP ER quartile_Q1                                    | .0122202  | .0071643 | 1.71  | 0.088 | -.0018217 | .026262   |
| MBSF Comp FFS IP ER quartile_Q2                                    | .0011401  | .0048505 | 0.24  | 0.814 | -.0083668 | .0106469  |
| MBSF Comp FFS IP ER quartile_Q4                                    | -.0134364 | .0052219 | -2.57 | 0.010 | -.0236712 | -.0032015 |
| Alabama                                                            | -.0213779 | .0163799 | -1.31 | 0.192 | -.0534819 | .010726   |
| Arkansas                                                           | -.0019717 | .012019  | -0.16 | 0.870 | -.0255285 | .021585   |
| Arizona                                                            | -.0054867 | .014809  | -0.37 | 0.711 | -.0345118 | .0235384  |
| California                                                         | -.0166564 | .0121151 | -1.37 | 0.169 | -.0404015 | .0070886  |
| Colorado                                                           | .0026709  | .0116847 | 0.23  | 0.819 | -.0202308 | .0255725  |
| Connecticut                                                        | .0416337  | .0160398 | 2.60  | 0.009 | .0101962  | .0730712  |
| District of Columbia                                               | -.1296131 | .0190577 | -6.80 | 0.000 | -.1669654 | -.0922608 |
| Georgia                                                            | -.0234098 | .0152059 | -1.54 | 0.124 | -.0532127 | .0063932  |
| Iowa                                                               | -.024399  | .0155746 | -1.57 | 0.117 | -.0549246 | .0061266  |
| Idaho                                                              | -.0140821 | .0422882 | -0.33 | 0.739 | -.0969654 | .0688012  |
| Illinois                                                           | .0004505  | .0114528 | 0.04  | 0.969 | -.0219967 | .0228976  |
| Indiana                                                            | -.0137294 | .0158122 | -0.87 | 0.385 | -.0447207 | .0172619  |
| Kansas                                                             | -.0050471 | .0137264 | -0.37 | 0.713 | -.0319504 | .0218561  |
| Kentucky                                                           | -.0140835 | .0137309 | -1.03 | 0.305 | -.0409956 | .0128285  |
| Louisiana                                                          | -.0091423 | .0189069 | -0.48 | 0.629 | -.046199  | .0279145  |
| Massachusetts                                                      | .0221598  | .0105923 | 2.09  | 0.036 | .0013992  | .0429203  |
| Maine                                                              | -.0091444 | .012916  | -0.71 | 0.479 | -.0344594 | .0161706  |
| Michigan                                                           | .0164939  | .0109454 | 1.51  | 0.132 | -.0049587 | .0379464  |
| Minnesota                                                          | .0095343  | .0131689 | 0.72  | 0.469 | -.0162764 | .0353449  |
| Missouri                                                           | -.0131584 | .0143391 | -0.92 | 0.359 | -.0412625 | .0149457  |
| Mississippi                                                        | .0236936  | .0135517 | 1.75  | 0.080 | -.0028673 | .0502545  |

|                |           |          |       |       |           |           |
|----------------|-----------|----------|-------|-------|-----------|-----------|
| Montana        | -.0557422 | .0549447 | -1.01 | 0.310 | -.1634319 | .0519475  |
| North Carolina | -.0125618 | .0136483 | -0.92 | 0.357 | -.0393119 | .0141883  |
| North Dakota   | .0221243  | .01934   | 1.14  | 0.253 | -.0157815 | .06003    |
| Nebraska       | -.0010859 | .0162441 | -0.07 | 0.947 | -.0329237 | .030752   |
| New Hampshire  | .094661   | .01817   | 5.21  | 0.000 | .0590485  | .1302736  |
| New Jersey     | .0042295  | .010916  | 0.39  | 0.698 | -.0171654 | .0256244  |
| New Mexico     | -.0339709 | .0228607 | -1.49 | 0.137 | -.0787771 | .0108352  |
| Nevada         | -.0276537 | .012326  | -2.24 | 0.025 | -.0518122 | -.0034953 |
| New York       | .0269266  | .0103427 | 2.60  | 0.009 | .0066553  | .047198   |
| Ohio           | .019216   | .0105551 | 1.82  | 0.069 | -.0014716 | .0399035  |
| Oklahoma       | -.0372362 | .0130479 | -2.85 | 0.004 | -.0628096 | -.0116628 |
| Oregon         | -.0117839 | .0134931 | -0.87 | 0.382 | -.0382298 | .014662   |
| Pennsylvania   | -.003978  | .0105158 | -0.38 | 0.705 | -.0245887 | .0166327  |
| Rhode Island   | .0719464  | .0126404 | 5.69  | 0.000 | .0471716  | .0967212  |
| South Carolina | -.0198842 | .0139062 | -1.43 | 0.153 | -.0471397 | .0073714  |
| South Dakota   | -.1092851 | .0165275 | -6.61 | 0.000 | -.1416785 | -.0768917 |
| Tennessee      | .0049808  | .0109894 | 0.45  | 0.650 | -.0165581 | .0265196  |
| Texas          | -.0177494 | .0099655 | -1.78 | 0.075 | -.0372814 | .0017825  |
| Utah           | -.0109914 | .0161068 | -0.68 | 0.495 | -.0425601 | .0205772  |
| Virginia       | -.0034775 | .012326  | -0.28 | 0.778 | -.027636  | .0206811  |
| Washington     | -.0316812 | .0199982 | -1.58 | 0.113 | -.070877  | .0075146  |
| Wisconsin      | .0216506  | .0135752 | 1.59  | 0.111 | -.0049562 | .0482575  |
| West Virginia  | -.0155125 | .0210944 | -0.74 | 0.462 | -.0568568 | .0258318  |
| _constant      | .8273172  | .0128605 | 64.33 | 0.000 | .802111   | .8525234  |

<sup>a</sup> Difference-in-differences regression analysis.

TKI=tyrosine kinase inhibitor; OCM=Oncology Care Model; HCC=Hierarchical Condition Category; Q=quartile; NPI=National Provider Identifier; NP=Nurse practitioner; PA=physician's assistant; PCP=primary care physician; MBSF=Master Beneficiary Summary File; FFS=fee-for-service; IP=inpatient; ER=emergency room.

**Supplementary Table 6: Adherence to Abiraterone or Enzalutamide for Prostate Cancer: Full Model Results<sup>a</sup>**

| Episode characteristics                                | Coefficient | Robust Standard Error | t      | P> t  | 95% Confidence Interval |           |
|--------------------------------------------------------|-------------|-----------------------|--------|-------|-------------------------|-----------|
| OCM                                                    | -.4894995   | .4272275              | -1.15  | 0.252 | -1.328282               | .3492829  |
| Intervention period                                    | -4.606566   | .3178724              | -14.49 | 0.000 | -5.23065                | -3.982482 |
| Interaction of OCM * intervention                      | .4379734    | .4536685              | 0.97   | 0.335 | -.452721                | 1.328668  |
| Black                                                  | -1.89197    | .3942356              | -4.80  | 0.000 | -2.665979               | -1.117961 |
| Hispanic                                               | -1.161144   | .5114991              | -2.27  | 0.024 | -2.165378               | -.1569095 |
| Other                                                  | -.1894297   | .5140404              | -0.37  | 0.713 | -1.198653               | .8197939  |
| 65-69                                                  | .2612503    | .6019178              | 0.43   | 0.664 | -.9205041               | 1.443005  |
| 70-74                                                  | .5840506    | .600594               | 0.97   | 0.331 | -.5951049               | 1.763206  |
| 75-79                                                  | .0785989    | .5757672              | 0.14   | 0.891 | -1.051814               | 1.209012  |
| 80-84                                                  | -.7706805   | .6223027              | -1.24  | 0.216 | -1.992457               | .4510962  |
| Over 84                                                | -2.087907   | .6246645              | -3.34  | 0.001 | -3.31432                | -.8614934 |
| Dual Eligible                                          | 1.416217    | .3783449              | 3.74   | 0.000 | .6734062                | 2.159027  |
| Beneficiary alignment in other value-based models      | -.2064644   | .2250274              | -0.92  | 0.359 | -.6482642               | .2353354  |
| Beneficiary had previous episode in performance period | -.3330747   | .2667645              | -1.25  | 0.212 | -.8568176               | .1906681  |
| HCC Risk Score_Q2                                      | -1.722216   | .4033996              | -4.27  | 0.000 | -2.514217               | -.9302156 |
| HCC Risk Score_Q3                                      | -2.055577   | .3016714              | -6.81  | 0.000 | -2.647853               | -1.463301 |
| HCC Risk Score_Q4                                      | -3.405792   | .330175               | -10.32 | 0.000 | -4.054029               | -2.757554 |
| Affiliated with Academic Medical Center                | -1.228171   | .471616               | -2.60  | 0.009 | -2.154102               | -.3022402 |
| Affiliated with health system                          | .344304     | .3748772              | 0.92   | 0.359 | -.3916982               | 1.080306  |
| Owned by a hospital                                    | -.0643017   | .3818645              | -0.17  | 0.866 | -.8140222               | .6854188  |
| SK&A data missing                                      | -2.629376   | 1.536129              | -1.71  | 0.087 | -5.645283               | .38653    |
| Total N episodes quartile_Q2                           | 1.119845    | .8841998              | 1.27   | 0.206 | -.616118                | 2.855808  |
| Total N episodes quartile_Q3                           | .9947095    | .8810304              | 1.13   | 0.259 | -.7350311               | 2.72445   |
| Total N episodes quartile_Q4                           | .9074806    | .8881343              | 1.02   | 0.307 | -.8362073               | 2.651168  |
| Practice has 3 or less oncology NPIs                   | .7030358    | .5342889              | 1.32   | 0.189 | -.3459419               | 1.752013  |
| NPIs that only have oncology specialty                 | -.3388806   | .3912918              | -0.87  | 0.387 | -1.10711                | .4293487  |
| Practice has at least one radiation oncologist         | .5487752    | .3463393              | 1.58   | 0.114 | -.1311981               | 1.228749  |
| Practice has at least one surgical oncologist          | .3032989    | .3717363              | 0.82   | 0.415 | -.4265368               | 1.033135  |
| Practice has at least one gynecologic oncologist       | .3968174    | .3779747              | 1.05   | 0.294 | -.3452663               | 1.138901  |
| Percent NP/PA Quartile_Q2                              | .8170596    | .4507422              | 1.81   | 0.070 | -.0678896               | 1.702009  |
| Percent NP/PA Quartile_Q3                              | -.0982533   | .4118138              | -0.24  | 0.811 | -.9067737               | .7102671  |
| Percent NP/PA Quartile_Q4                              | -.0271791   | .4319994              | -0.06  | 0.950 | -.8753302               | .8209721  |
| Market population quartile_Q2                          | -.8522222   | .7913423              | -1.08  | 0.282 | -2.405877               | .7014324  |
| Market population quartile_Q3                          | -1.084445   | .7981362              | -1.36  | 0.175 | -2.651438               | .4825482  |
| Market population quartile_Q4                          | -1.256068   | .8277941              | -1.52  | 0.130 | -2.881289               | .3691533  |

|                                                                    |           |          |       |       |           |           |
|--------------------------------------------------------------------|-----------|----------|-------|-------|-----------|-----------|
| Percent over 65 quartile_Q2                                        | -.8506981 | .4113689 | -2.07 | 0.039 | -1.658345 | -.0430511 |
| Percent over 65 quartile_Q3                                        | -.278058  | .5193684 | -0.54 | 0.593 | -1.297742 | .7416262  |
| Percent over 65 quartile_Q4                                        | -.545453  | .6645314 | -0.82 | 0.412 | -1.850138 | .7592318  |
| Percent poverty quartile_Q2                                        | -.5163249 | .4171393 | -1.24 | 0.216 | -1.335301 | .3026512  |
| Percent poverty quartile_Q3                                        | -.619869  | .4929254 | -1.26 | 0.209 | -1.587637 | .3478991  |
| Percent poverty quartile_Q4                                        | -.3413157 | .5620039 | -0.61 | 0.544 | -1.444707 | .7620754  |
| Medicare Advantage penetration quartile_Q2                         | .8531648  | .5176911 | 1.65  | 0.100 | -.1632262 | 1.869556  |
| Medicare Advantage penetration quartile_Q3                         | .3341749  | .616287  | 0.54  | 0.588 | -.8757909 | 1.544141  |
| Medicare Advantage penetration quartile_Q4                         | .9480667  | .6678814 | 1.42  | 0.156 | -.3631953 | 2.259329  |
| Primary care health professional shortage area category_>0 to 20   | -.3758392 | .3651497 | -1.03 | 0.304 | -1.092743 | .3410648  |
| Primary care health professional shortage area category_>20 to 100 | -3.08952  | 1.499917 | -2.06 | 0.040 | -6.03433  | -.1447101 |
| Specialists per PCP ratio quartile_Q2                              | .7107558  | .7523345 | 0.94  | 0.345 | -.7663142 | 2.187826  |
| Specialists per PCP ratio quartile_Q3                              | .6078751  | .6790492 | 0.90  | 0.371 | -.7253129 | 1.941063  |
| Specialists per PCP ratio quartile_Q4                              | .6745581  | .7034703 | 0.96  | 0.338 | -.7065761 | 2.055692  |
| MBSF Comp FFS IP ER quartile_Q2                                    | -.0837738 | .6291761 | -0.13 | 0.894 | -1.319045 | 1.151497  |
| MBSF Comp FFS IP ER quartile_Q3                                    | .3009066  | .7004353 | 0.43  | 0.668 | -1.074269 | 1.676082  |
| MBSF Comp FFS IP ER quartile_Q4                                    | -.0131974 | .7688551 | -0.02 | 0.986 | -1.522703 | 1.496308  |
| Alabama                                                            | -.4563904 | 1.320368 | -0.35 | 0.730 | -3.04869  | 2.135909  |
| Arizona                                                            | -.939536  | 1.039826 | -0.90 | 0.367 | -2.981043 | 1.101971  |
| Arkansas                                                           | .6888682  | 1.161962 | 0.59  | 0.553 | -1.592431 | 2.970167  |
| California                                                         | -.2221213 | .9537008 | -0.23 | 0.816 | -2.094537 | 1.650294  |
| Colorado                                                           | .7809898  | 1.275537 | 0.61  | 0.541 | -1.723292 | 3.285272  |
| Connecticut                                                        | 1.238794  | 1.227672 | 1.01  | 0.313 | -1.171514 | 3.649102  |
| District of Columbia                                               | -4.566042 | 3.00432  | -1.52 | 0.129 | -10.46447 | 1.332385  |
| Georgia                                                            | -.8788016 | 1.074107 | -0.82 | 0.414 | -2.987613 | 1.23001   |
| Idaho                                                              | 2.237262  | 1.084369 | 2.06  | 0.039 | .1083027  | 4.366221  |
| Illinois                                                           | -.246478  | .8590769 | -0.29 | 0.774 | -1.933117 | 1.440161  |
| Indiana                                                            | -1.151089 | 1.60447  | -0.72 | 0.473 | -4.301169 | 1.998991  |
| Iowa                                                               | .872898   | 1.124267 | 0.78  | 0.438 | -1.334392 | 3.080188  |
| Kansas                                                             | -.9144104 | 1.052117 | -0.87 | 0.385 | -2.980048 | 1.151227  |
| Kentucky                                                           | -1.774452 | .8771596 | -2.02 | 0.043 | -3.496593 | -.0523106 |
| Louisiana                                                          | -.852798  | 1.406336 | -0.61 | 0.544 | -3.61388  | 1.908284  |
| Maine                                                              | 2.372415  | 1.194395 | 1.99  | 0.047 | .0274412  | 4.717389  |
| Massachusetts                                                      | .0947105  | 1.1027   | 0.09  | 0.932 | -2.070238 | 2.259659  |
| Michigan                                                           | -.6345659 | 1.079831 | -0.59 | 0.557 | -2.754616 | 1.485484  |
| Minnesota                                                          | -5.618383 | 1.077265 | -5.22 | 0.000 | -7.733395 | -3.503371 |
| Mississippi                                                        | .9808594  | 1.334062 | 0.74  | 0.462 | -1.638325 | 3.600044  |
| Missouri                                                           | .383543   | 1.099977 | 0.35  | 0.727 | -1.776059 | 2.543145  |
| Montana                                                            | -2.193341 | 1.29714  | -1.69 | 0.091 | -4.740036 | .3533535  |
| Nebraska                                                           | 1.061462  | 1.085646 | 0.98  | 0.329 | -1.070004 | 3.192929  |

|                |           |          |       |       |           |           |
|----------------|-----------|----------|-------|-------|-----------|-----------|
| Nevada         | 1.22628   | 1.834356 | 0.67  | 0.504 | -2.37514  | 4.827699  |
| New Hampshire  | -1.703105 | 1.210924 | -1.41 | 0.160 | -4.08053  | .6743201  |
| New Jersey     | -.905739  | .7864976 | -1.15 | 0.250 | -2.449882 | .6384041  |
| New Mexico     | -1.601248 | 1.490557 | -1.07 | 0.283 | -4.527681 | 1.325185  |
| New York       | .9066484  | .7427916 | 1.22  | 0.223 | -.551686  | 2.364983  |
| North Carolina | -.6365711 | .8577933 | -0.74 | 0.458 | -2.32069  | 1.047548  |
| North Dakota   | -1.333924 | 2.38447  | -0.56 | 0.576 | -6.015392 | 3.347543  |
| Ohio           | .3970645  | .9821262 | 0.40  | 0.686 | -1.531159 | 2.325288  |
| Oklahoma       | -2.35873  | 1.702688 | -1.39 | 0.166 | -5.701645 | .9841845  |
| Oregon         | .0262733  | 1.626137 | 0.02  | 0.987 | -3.166346 | 3.218893  |
| Pennsylvania   | .072084   | .7335184 | 0.10  | 0.922 | -1.368044 | 1.512212  |
| Rhode Island   | -2.916115 | 1.13826  | -2.56 | 0.011 | -5.150878 | -.6813512 |
| South Carolina | .2806796  | 1.566893 | 0.18  | 0.858 | -2.795626 | 3.356985  |
| South Dakota   | -2.120335 | 1.259391 | -1.68 | 0.093 | -4.592918 | .3522476  |
| Tennessee      | -.1440661 | 1.466754 | -0.10 | 0.922 | -3.023767 | 2.735635  |
| Texas          | -1.686263 | .7392734 | -2.28 | 0.023 | -3.13769  | -.2348357 |
| Utah           | .117424   | 1.798834 | 0.07  | 0.948 | -3.414255 | 3.649103  |
| Virginia       | -1.70634  | 1.013681 | -1.68 | 0.093 | -3.696515 | .2838356  |
| Washington     | -.3859322 | 1.367283 | -0.28 | 0.778 | -3.070341 | 2.298477  |
| West Virginia  | 1.068742  | .9654783 | 1.11  | 0.269 | -.8267964 | 2.964281  |
| Wisconsin      | -.0537148 | .881701  | -0.06 | 0.951 | -1.784772 | 1.677342  |
| _ constant     | 91.80481  | 1.759686 | 52.17 | 0.000 | 88.35     | 95.25963  |

<sup>a</sup> Difference-in-differences regression analysis.

OCM=Oncology Care Model; HCC=Hierarchical Condition Category; Q=Quartile; NPI=National Provider Identifier; NP=Nurse practitioner; PA=physician's assistant; PCP=primary care physician; MBSF=Master Beneficiary Summary File; FFS=fee-for-service; IP=inpatient; ER=emergency room

**Supplementary Table 7: Adherence to Hormonal Therapy for Low-Risk Breast Cancer**

| Episode characteristics                                | Coefficient | Robust Standard Error | t      | P> t  | 95% Confidence Interval |           |
|--------------------------------------------------------|-------------|-----------------------|--------|-------|-------------------------|-----------|
| OCM                                                    | -.0025454   | .0012381              | -2.06  | 0.040 | -.0049721               | -.0001187 |
| Intervention period                                    | .0038534    | .0008254              | 4.67   | 0.000 | .0022357                | .0054711  |
| Interaction of OCM * intervention                      | .0002249    | .0012424              | 0.18   | 0.856 | -.0022102               | .0026601  |
| Male                                                   | .0141749    | .002411               | 5.88   | 0.000 | .0094494                | .0189003  |
| Black                                                  | -.0144627   | .0011982              | -12.07 | 0.000 | -.0168111               | -.0121144 |
| Hispanic                                               | -.0063306   | .0014171              | -4.47  | 0.000 | -.009108                | -.0035531 |
| Other                                                  | .0043684    | .0016443              | 2.66   | 0.008 | .0011456                | .0075911  |
| Dual Eligible                                          | -.0015682   | .0009331              | -1.68  | 0.093 | -.0033971               | .0002607  |
| Beneficiary alignment in other value-based models      | .0015957    | .000622               | 2.57   | 0.010 | .0003766                | .0028148  |
| HCC Risk Score_Q1                                      | .0123492    | .001307               | 9.45   | 0.000 | .0097876                | .0149109  |
| HCC Risk Score_Q2                                      | .0053951    | .0012695              | 4.25   | 0.000 | .002907                 | .0078833  |
| HCC Risk Score_Q3                                      | .006887     | .0013424              | 5.13   | 0.000 | .0042559                | .009518   |
| Under 65                                               | -.0266056   | .0012963              | -20.52 | 0.000 | -.0291463               | -.0240649 |
| 70-74                                                  | .0015697    | .0006454              | 2.43   | 0.015 | .0003047                | .0028347  |
| 75-79                                                  | -.0007634   | .0008552              | -0.89  | 0.372 | -.0024396               | .0009128  |
| 80-84                                                  | -.0031263   | .0009814              | -3.19  | 0.001 | -.0050498               | -.0012028 |
| Over 84                                                | -.0026003   | .0010492              | -2.48  | 0.013 | -.0046567               | -.0005439 |
| Beneficiary had previous episode in performance period | .0229181    | .0005546              | 41.32  | 0.000 | .0218311                | .0240052  |
| Affiliated with Academic Medical Center                | -.0020656   | .0013895              | -1.49  | 0.137 | -.0047889               | .0006578  |
| Affiliated with health system                          | .0017834    | .0010483              | 1.70   | 0.089 | -.0002713               | .0038381  |
| Owned by a hospital                                    | .0001495    | .0009691              | 0.15   | 0.877 | -.0017499               | .0020489  |
| SK&A data missing                                      | -.0068251   | .0048851              | -1.40  | 0.162 | -.0163998               | .0027496  |
| Total N episodes quartile_Q1                           | -.0060961   | .0023545              | -2.59  | 0.010 | -.0107109               | -.0014813 |
| Total N episodes quartile_Q2                           | -.0020702   | .0013035              | -1.59  | 0.112 | -.0046249               | .0004846  |
| Total N episodes quartile_Q3                           | -.0007366   | .0009805              | -0.75  | 0.452 | -.0026583               | .0011851  |
| Practice has 3 or less oncology NPIs                   | .0024362    | .0014914              | 1.63   | 0.102 | -.0004869               | .0053593  |
| NPIs that only have oncology specialty                 | -.001751    | .0010393              | -1.68  | 0.092 | -.0037879               | .0002859  |
| Practice has at least one radiation oncologist         | -.0007878   | .0011345              | -0.69  | 0.487 | -.0030115               | .0014358  |
| Practice has at least one surgical oncologist          | .0021791    | .0010525              | 2.07   | 0.038 | .0001163                | .0042419  |
| Practice has at least one gynecologic oncologist       | -.000691    | .0011447              | -0.60  | 0.546 | -.0029346               | .0015526  |
| Percent NP/PA Quartile_Q1                              | .0030498    | .0010885              | 2.80   | 0.005 | .0009164                | .0051832  |
| Percent NP/PA Quartile_Q2                              | .001817     | .0014209              | 1.28   | 0.201 | -.0009679               | .0046019  |
| Percent NP/PA Quartile_Q3                              | -.0001937   | .0008081              | -0.24  | 0.811 | -.0017776               | .0013902  |
| Market population quartile_Q1                          | .0016319    | .0024509              | 0.67   | 0.506 | -.0031718               | .0064356  |
| Market population quartile_Q2                          | .0023387    | .0015619              | 1.50   | 0.134 | -.0007225               | .0053998  |

|                                                                    |           |          |       |       |           |           |
|--------------------------------------------------------------------|-----------|----------|-------|-------|-----------|-----------|
| Market population quartile_Q3                                      | .0012536  | .0012411 | 1.01  | 0.312 | -.001179  | .0036862  |
| Percent over 65 quartile_Q2                                        | -.0001432 | .0010197 | -0.14 | 0.888 | -.0021417 | .0018553  |
| Percent over 65 quartile_Q3                                        | .0017659  | .0013069 | 1.35  | 0.177 | -.0007955 | .0043273  |
| Percent over 65 quartile_Q4                                        | .0026212  | .0017283 | 1.52  | 0.129 | -.0007662 | .0060087  |
| Percent poverty quartile_Q1                                        | .001663   | .001273  | 1.31  | 0.191 | -.0008322 | .0041581  |
| Percent poverty quartile_Q2                                        | .0006446  | .0009142 | 0.71  | 0.481 | -.0011472 | .0024364  |
| Percent poverty quartile_Q4                                        | -.000554  | .0011771 | -0.47 | 0.638 | -.0028612 | .0017532  |
| Medicare Advantage penetration quartile_Q1                         | -.0002496 | .0017684 | -0.14 | 0.888 | -.0037155 | .0032163  |
| Medicare Advantage penetration quartile_Q2                         | -.0013148 | .0010893 | -1.21 | 0.227 | -.0034498 | .0008203  |
| Medicare Advantage penetration quartile_Q4                         | .0017958  | .0010423 | 1.72  | 0.085 | -.0002471 | .0038388  |
| Primary care health professional shortage area category_0          | -.0001183 | .0009349 | -0.13 | 0.899 | -.0019506 | .0017141  |
| Primary care health professional shortage area category_>20 to 100 | .0054456  | .0022891 | 2.38  | 0.017 | .0009591  | .0099321  |
| Specialists per PCP ratio quartile_Q1                              | -.0053944 | .0021842 | -2.47 | 0.014 | -.0096755 | -.0011134 |
| Specialists per PCP ratio quartile_Q2                              | -.0048895 | .001515  | -3.23 | 0.001 | -.0078588 | -.0019202 |
| Specialists per PCP ratio quartile_Q3                              | -.0022639 | .0011884 | -1.91 | 0.057 | -.0045931 | .0000653  |
| MBSF Comp FFS IP ER quartile_Q1                                    | -.0028956 | .0019052 | -1.52 | 0.129 | -.0066298 | .0008386  |
| MBSF Comp FFS IP ER quartile_Q2                                    | .0008728  | .0011918 | 0.73  | 0.464 | -.001463  | .0032086  |
| MBSF Comp FFS IP ER quartile_Q4                                    | .0001113  | .0011543 | 0.10  | 0.923 | -.0021511 | .0023736  |
| Alabama                                                            | .007058   | .0037138 | 1.90  | 0.057 | -.0002209 | .014337   |
| Arkansas                                                           | .0032894  | .0027825 | 1.18  | 0.237 | -.0021643 | .008743   |
| Arizona                                                            | .0025233  | .0039783 | 0.63  | 0.526 | -.005274  | .0103207  |
| California                                                         | .0017833  | .0026553 | 0.67  | 0.502 | -.003421  | .0069877  |
| Colorado                                                           | .0056131  | .0031285 | 1.79  | 0.073 | -.0005186 | .0117447  |
| Connecticut                                                        | .0102893  | .0032992 | 3.12  | 0.002 | .003823   | .0167556  |
| District of Columbia                                               | .0077718  | .00561   | 1.39  | 0.166 | -.0032235 | .0187672  |
| Georgia                                                            | -.0039366 | .0033844 | -1.16 | 0.245 | -.0105699 | .0026968  |
| Iowa                                                               | .0181256  | .0032627 | 5.56  | 0.000 | .0117308  | .0245205  |
| Idaho                                                              | .0116198  | .003638  | 3.19  | 0.001 | .0044894  | .0187501  |
| Illinois                                                           | .0151749  | .0026512 | 5.72  | 0.000 | .0099786  | .0203712  |
| Indiana                                                            | .0157618  | .003312  | 4.76  | 0.000 | .0092704  | .0222532  |
| Kansas                                                             | .0093222  | .0055271 | 1.69  | 0.092 | -.0015107 | .0201552  |
| Kentucky                                                           | .0035994  | .0031054 | 1.16  | 0.246 | -.0024871 | .0096858  |
| Louisiana                                                          | -.0026967 | .003099  | -0.87 | 0.384 | -.0087705 | .0033772  |
| Massachusetts                                                      | .0128848  | .0036734 | 3.51  | 0.000 | .005685   | .0200845  |
| Maine                                                              | .0078157  | .0030144 | 2.59  | 0.010 | .0019075  | .0137239  |
| Michigan                                                           | .007974   | .0023159 | 3.44  | 0.001 | .0034349  | .012513   |
| Minnesota                                                          | .0209268  | .0042108 | 4.97  | 0.000 | .0126737  | .0291798  |
| Missouri                                                           | .0108115  | .0027981 | 3.86  | 0.000 | .0053273  | .0162957  |



|                |           |          |        |       |           |           |
|----------------|-----------|----------|--------|-------|-----------|-----------|
| Mississippi    | .0033037  | .0042373 | 0.78   | 0.436 | -.0050012 | .0116087  |
| Montana        | .0151984  | .0048318 | 3.15   | 0.002 | .0057283  | .0246686  |
| North Carolina | .0035359  | .002934  | 1.21   | 0.228 | -.0022146 | .0092865  |
| North Dakota   | .0173486  | .0031588 | 5.49   | 0.000 | .0111575  | .0235397  |
| Nebraska       | .0204657  | .0028582 | 7.16   | 0.000 | .0148636  | .0260677  |
| New Hampshire  | .0088353  | .0035299 | 2.50   | 0.012 | .0019169  | .0157538  |
| New Jersey     | .0186694  | .0026524 | 7.04   | 0.000 | .0134708  | .0238681  |
| New Mexico     | -.0040481 | .0058935 | -0.69  | 0.492 | -.0155992 | .007503   |
| Nevada         | -.0099327 | .0036444 | -2.73  | 0.006 | -.0170756 | -.0027898 |
| New York       | .010348   | .0026031 | 3.98   | 0.000 | .0052461  | .0154499  |
| Ohio           | .0067941  | .0024516 | 2.77   | 0.006 | .001989   | .0115992  |
| Oklahoma       | -.0033797 | .0039875 | -0.85  | 0.397 | -.0111951 | .0044356  |
| Oregon         | -.0034873 | .0049621 | -0.70  | 0.482 | -.0132128 | .0062382  |
| Pennsylvania   | .0075429  | .0020677 | 3.65   | 0.000 | .0034902  | .0115956  |
| Rhode Island   | .0133335  | .0028692 | 4.65   | 0.000 | .00771    | .0189571  |
| South Carolina | .0014317  | .0036768 | 0.39   | 0.697 | -.0057747 | .0086381  |
| South Dakota   | .0065328  | .0041854 | 1.56   | 0.119 | -.0016704 | .0147359  |
| Tennessee      | .0025199  | .0034033 | 0.74   | 0.459 | -.0041505 | .0091902  |
| Texas          | .0014139  | .0022603 | 0.63   | 0.532 | -.0030161 | .0058439  |
| Utah           | .006399   | .0034817 | 1.84   | 0.066 | -.0004251 | .0132231  |
| Virginia       | .0059447  | .0033927 | 1.75   | 0.080 | -.0007049 | .0125943  |
| Washington     | .000225   | .0045049 | 0.05   | 0.960 | -.0086044 | .0090543  |
| Wisconsin      | .0171958  | .0033561 | 5.12   | 0.000 | .0106179  | .0237737  |
| West Virginia  | .0075304  | .0030365 | 2.48   | 0.013 | .0015791  | .0134818  |
| _ constant     | .8816131  | .0030779 | 286.43 | 0.000 | .8755805  | .8876458  |

<sup>a</sup> Difference-in-differences regression analysis.

OCM=Oncology Care Model; HCC=Hierarchical Condition Category; Q=Quartile; NPI=National Provider Identifier; NP=Nurse practitioner; PA=physician's assistant; PCP=primary care physician; MBSF=Master Beneficiary Summary File; FFS=fee-for-service; IP=inpatient; ER=emergency room

**Supplementary Table 8: Impact of OCM on Adherence to Oral Drugs for CML, Prostate Cancer, and Hormonal Therapy for Breast Cancer Among New Users<sup>a</sup>**

| Proportion of days covered         | No. of Episodes |            | OCM Proportion of Days Covered |                      | Comparison Proportion of Days Covered |                      | Impact Estimates |                |            |            |
|------------------------------------|-----------------|------------|--------------------------------|----------------------|---------------------------------------|----------------------|------------------|----------------|------------|------------|
|                                    | OCM             | Comparison | Baseline percent               | Intervention percent | Baseline percent                      | Intervention percent | DID, %           | P <sup>b</sup> | 90% LCL, % | 90% UCL, % |
| All tyrosine kinase inhibitors     | 2,911           | 3,253      | 84.5                           | 83.5                 | 84.8                                  | 83.2                 | 0.6              | 0.57           | -1.2       | 2.5        |
| Enzalutamide or abiraterone        | 4,165           | 5,027      | 89.3                           | 84.9                 | 90.0                                  | 85.4                 | 0.2              | 0.84           | -1.5       | 2.0        |
| Hormonal therapy for breast cancer | 115,867         | 125,363    | 89.2                           | 89.7                 | 89.6                                  | 90.0                 | 0.1              | 0.60           | -0.2       | 0.4        |

<sup>a</sup> Impact estimates and 2-sided P values based on difference-in-differences regression analysis. OCM: Oncology Care Model intervention group; DID: difference-in-differences estimate; LCL=lower confidence interval; UCL=upper confidence interval

## Supplementary Figures.

Supplementary Figure 1: Adherence in OCM and Comparison Practices by Quarter, Unadjusted

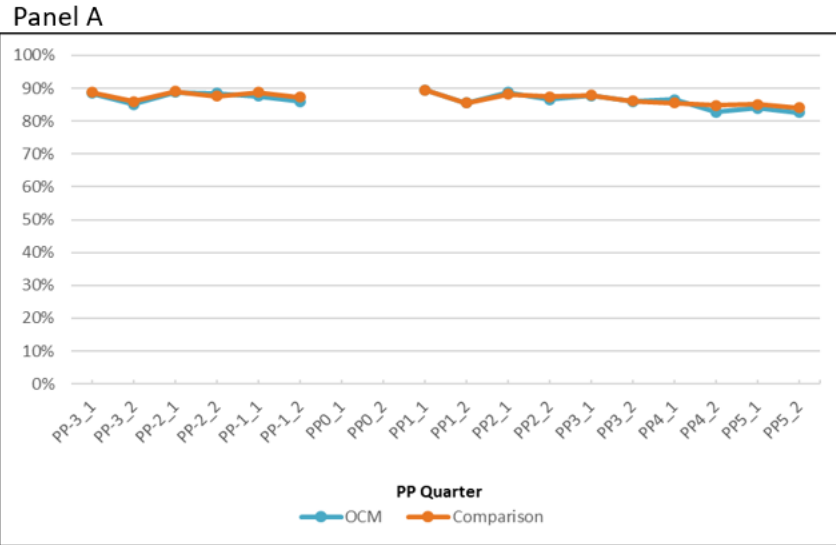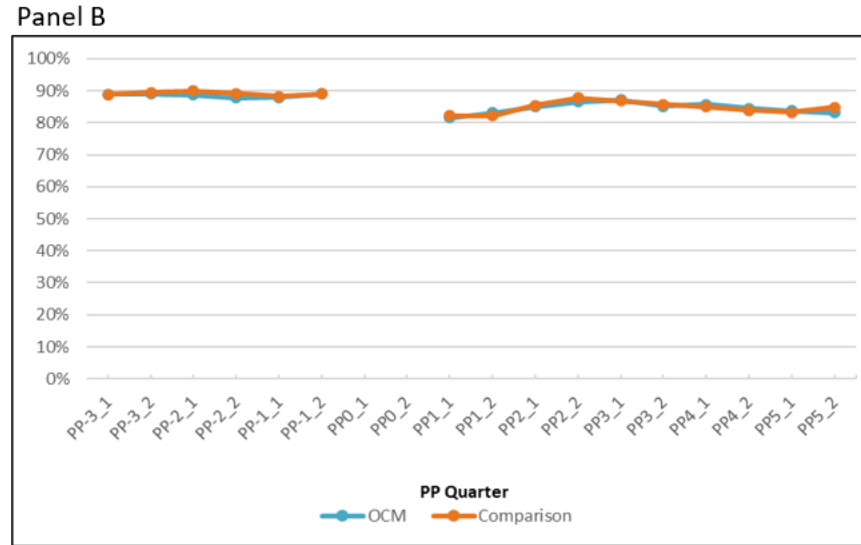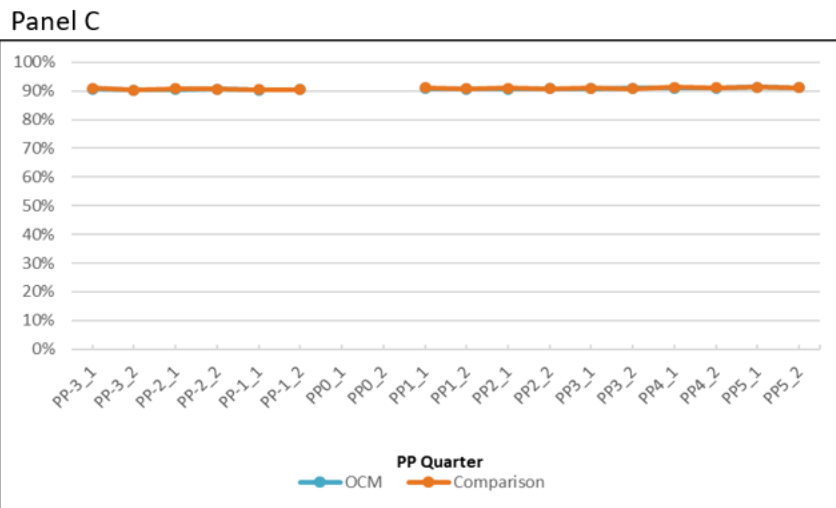

OCM=Oncology Care Model; PP=Performance Period

These figures show the quarterly trends in adherence by quarter in OCM and comparison practices. Panel A shows adherence to tyrosine kinase inhibitors for chronic myelogenous leukemia. Panel B shows adherence to abiraterone or enzalutamide for beneficiaries with high-intensity prostate cancer. Panel C shows adherence to hormonal therapy for patients with low-risk breast cancer. All panels show similar patterns of adherence in the pre-period for OCM and comparison episodes.

**Supplementary Figure 2. Adherence to TKIs for CML in OCM and Comparison Practices by Quarter, Unadjusted, Stratified by Race/Ethnicity**

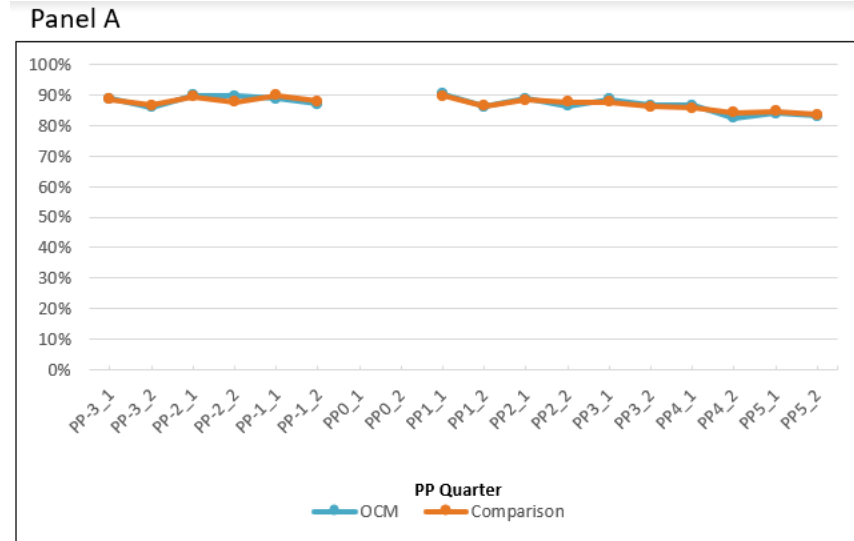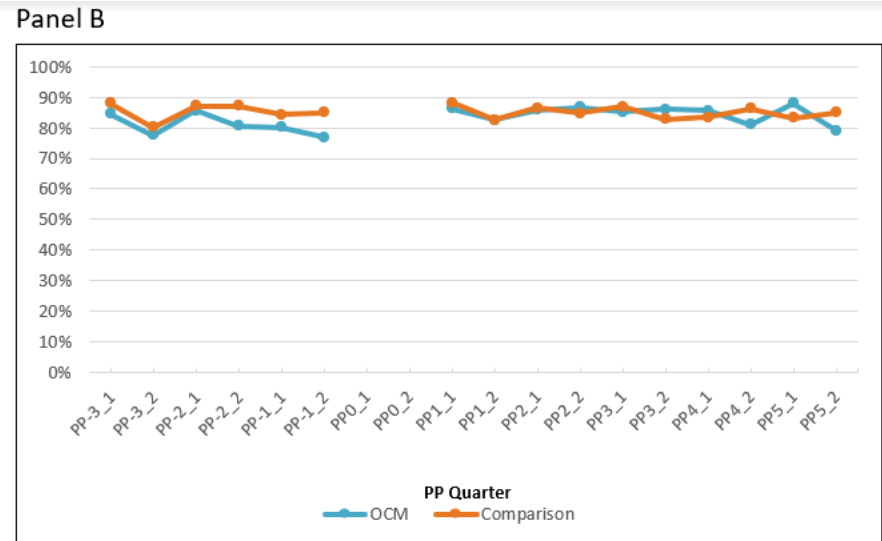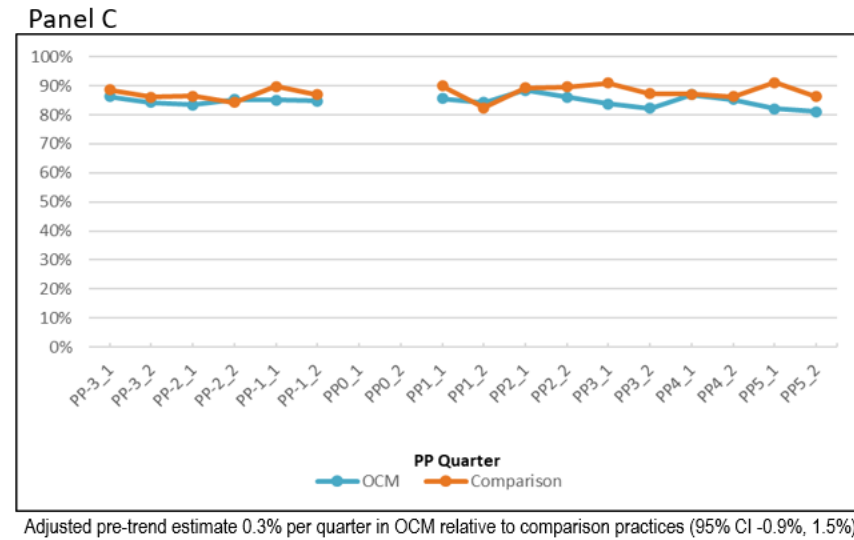

TKI=Tyrosine Kinase Inhibitor; CML=Chronic Myelogenous Leukemia; OCM=Oncology Care Model; PP=Performance Period

These figures show the quarterly trends in adherence to TKIs for CML by quarter in OCM and comparison practices, stratified by race/ethnicity. Panel A shows adherence for White beneficiaries. Panel B shows adherence for Black beneficiaries. Panel C shows adherence for Hispanic beneficiaries. Panels A and C show similar patterns of adherence in the pre-period for OCM and comparison episodes. Panel B shows evidence for differential trends; findings were robust to sensitivity analyses that adjusted for the differential trend, with a larger relative effect of OCM, given that lines were diverging at the end of the baseline period.

**Supplementary Figure 3. Adherence to Abiraterone or Enzalutamide for High-Intensity Prostate Cancer in OCM and Comparison Practices by Quarter, Unadjusted, Stratified by Race/Ethnicity**

Panel A

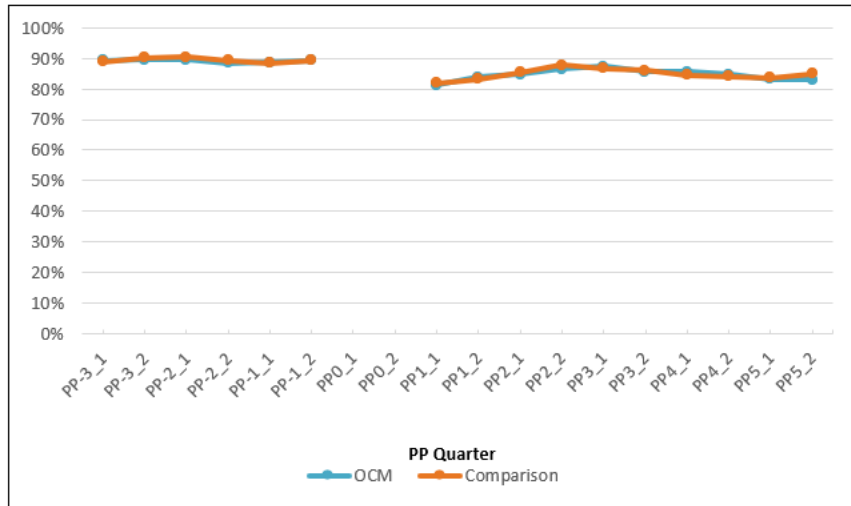

Adjusted pre-trend estimate 0.0% per quarter in OCM relative to comparison practices (95% CI -0.3%, 0.3%)

Panel B

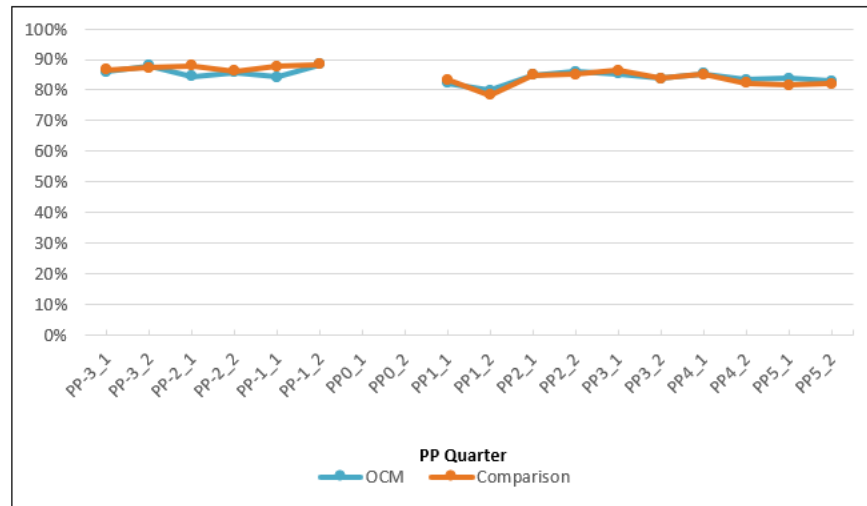

Adjusted pre-trend estimate -0.2% per quarter in OCM relative to comparison practices (95% CI -1.0%, 0.6%)

Panel C

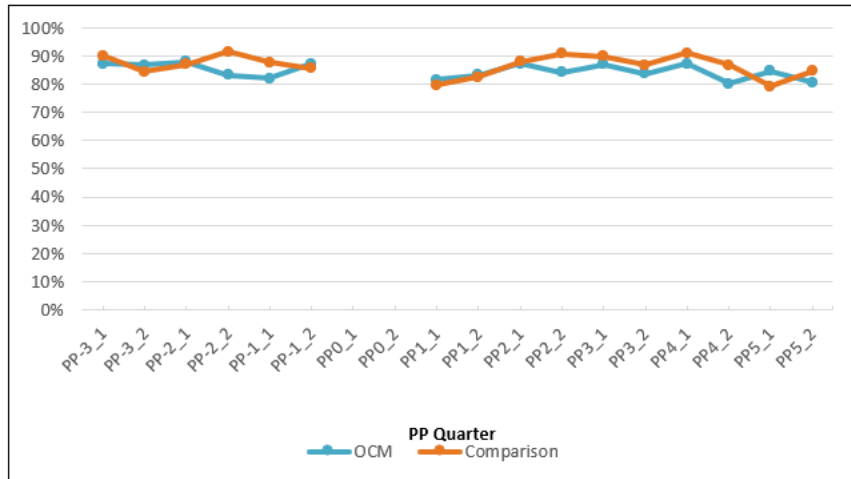

Adjusted pre-trend estimate 0.6% per quarter in OCM relative to comparison practices (95% CI -0.7%, 1.9%)

OCM=Oncology Care Model; PP=Performance Period

These figures show the quarterly trends in adherence to abiraterone/enzalutamide for high-intensity prostate cancer by quarter in OCM and comparison practices, stratified by race/ethnicity. Panel A shows adherence for White beneficiaries. Panel B shows adherence for Black beneficiaries. Panel C shows adherence for Hispanic beneficiaries. All panels show similar patterns of adherence in the pre-period for OCM and comparison episodes.

**Supplementary Figure 4. Adherence to Hormonal Therapy for Low-Risk Breast Cancer in OCM and Comparison Practices by Quarter, Unadjusted, Stratified by Race/Ethnicity**

Panel A

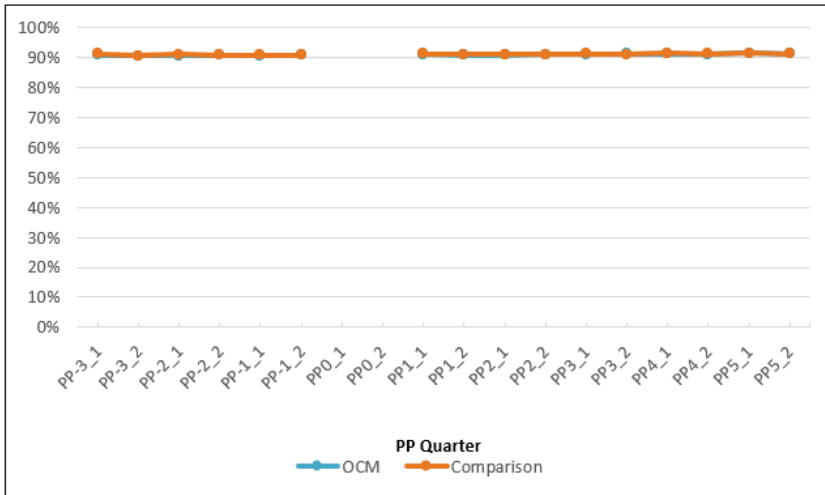

Adjusted pre-trend estimate 0.0% per quarter in OCM relative to comparison practices (95% CI -0.1%, 0.1%)

Panel B

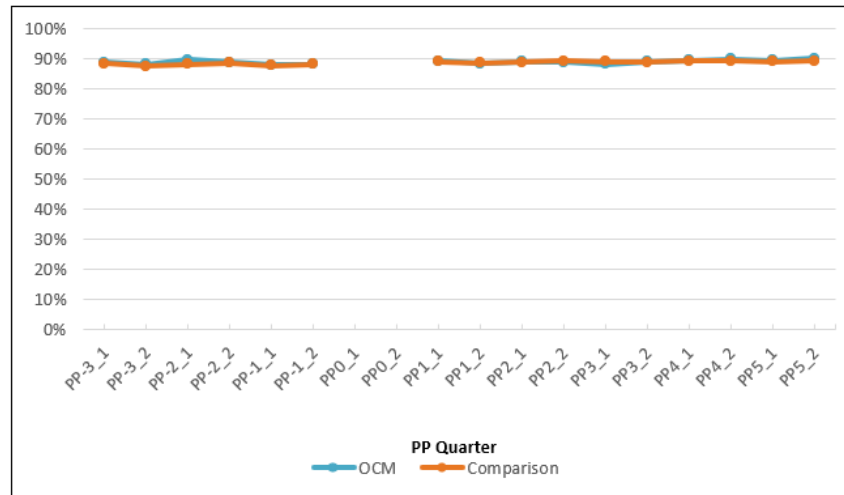

Adjusted pre-trend estimate -0.1% per quarter in OCM relative to comparison practices (95% CI -0.3%, 0.2%)

Panel C

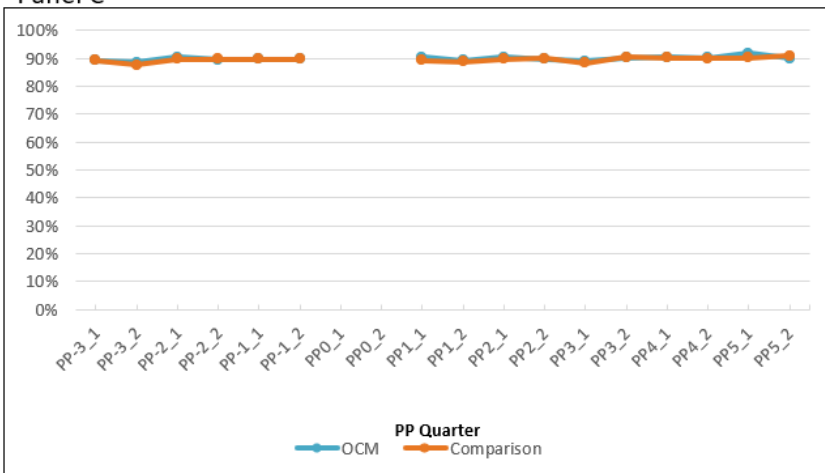

Adjusted pre-trend estimate -0.2% per quarter in OCM relative to comparison practices (95% CI -0.5%, 0.2%)

OCM=Oncology Care Model; PP=Performance Period

These figures show the quarterly trends in adherence to hormonal therapy for low-risk breast cancer by quarter in OCM and comparison practices, stratified by race/ethnicity. Panel A shows adherence for White beneficiaries. Panel B shows adherence for Black beneficiaries. Panel C shows adherence for Hispanic beneficiaries. All panels show similar patterns of adherence in the pre-period for OCM and comparison episodes.
